# Supplementary material for: The Dessau Grassland Experiment—Impact of Fertilization on Forage Quality and Species Assembly in a Species-Rich Alluvial Meadow
Source: MDPI journal article supplement (doi:10.3390/agriculture11040339), 2021-04-09
Supplement: s1 [file s1]

## Sheet: Raw data forage parameter
Table S1: Raw data of the forage quality parameters (crude fibre, crude protein, metabolizable energy).
No data available for treatment N120PK, block 2, year 2010, second cut
Fertilizer treatment	Block	Year	Crude protein (g kg DM)	Crude protein (g kg DM)	Crude fibre (g kg DM)	Crude fibre (g kg DM)	Metabolizable energy (MJ kg DM)	Metabolizable energy (MJ kg DM)
			first cut	second cut	first cut	second cut	first cut	second cut
N0	1	2010	104.35	117.788	282.733	255.405	8.9118	8.6011
N0	2	2010	94.2764	128.043	282.515	258.945	8.9508	9.5578
N0	3	2010	107.038	126.054	243.108	229.659	9.5991	9.6354
N0	4	2010	96.643	122.406	264.074	223.735	9.2636	10.4938
N0	1	2011	108.48	135.887	269.907	280.771	9.4302	9.1217
N0	2	2011	96.657	110.644	248.443	293.753	9.6016	8.6579
N0	3	2011	75.4638	103.093	253.387	299.39	9.4397	8.3191
N0	4	2011	80.5481	134.024	255.761	289.716	9.4175	8.5439
N0	1	2012	103.189	109.542	299.458	253.958	8.5151	9.6154
N0	2	2012	98.1883	92.2728	294.981	291.712	8.7573	9.1132
N0	3	2012	92.8368	92.5225	283.891	295.639	8.9717	8.9676
N0	4	2012	89.9139	112.76	302.264	271.757	8.6308	9.3105
N0	1	2013	108.813	161.76	277.23	268.075	9.143	7.9312
N0	2	2013	109.06	152.734	290.37	260.137	9.3131	8.3843
N0	3	2013	108.759	138.803	288.8	273.596	9.7247	8.0123
N0	4	2013	100.673	106.24	298.022	294.704	9.1604	8.0945
N0	1	2014	116.753	114.297	287.487	299.979	8.4274	7.581
N0	2	2014	111.1	120.656	290.584	265.915	8.6923	8.596
N0	3	2014	114.187	112.421	292.624	271.279	8.5525	7.8395
N0	4	2014	97.6583	105.324	298.12	288.51	8.4249	8.449
N0	1	2015	99.5752	121.355	282.976	290.567	9.0029	8.7193
N0	2	2015	96.9886	116.433	268.432	260.004	9.242	9.4346
N0	3	2015	106.869	112.859	251.414	249.628	8.4506	9.5008
N0	4	2015	95.2283	113.583	265.014	268.895	8.6253	9.1581
N0	1	2017	96.943	92.7419	309.987	311.12	8.7309	8.317
N0	2	2017	102.631	107.816	262.348	272.737	9.1686	8.8626
N0	3	2017	102.678	108.069	271.12	256.898	9.1003	9.1547
N0	4	2017	94.2104	119.9	275.783	223.268	8.8687	9.7168
N0PK	1	2010	101.87	110.65	291.043	245.648	8.871	10.0073
N0PK	2	2010	94.1348	120.555	283.657	234.227	9.1317	9.6582
N0PK	3	2010	99.7004	108.347	281.124	244.427	8.8677	10.0677
N0PK	4	2010	110.359	123.961	282.201	238.771	8.9712	10.48
N0PK	1	2011	107.509	115.13	271.258	288.403	9.3079	8.7681
N0PK	2	2011	90.6269	104.331	247.155	290.652	9.7684	8.6216
N0PK	3	2011	88.4707	136.187	255.432	278.578	9.4973	9.1291
N0PK	4	2011	88.1103	125.687	260.392	302.326	9.4263	8.6419
N0PK	1	2012	90.4703	90.3666	301.499	293.372	8.2354	8.7872
N0PK	2	2012	90.5606	90.5656	271.578	286.485	8.8777	9.2569
N0PK	3	2012	92.5751	88.8794	287.779	296.122	8.6788	8.9255
N0PK	4	2012	92.7716	107.75	296.491	291.502	8.5918	9.0311
N0PK	1	2013	111.134	149.917	271.302	267.442	9.412	7.8846
N0PK	2	2013	112.073	144.897	269.99	260.19	9.6451	8.4105
N0PK	3	2013	93.0233	110.187	298.135	272.746	9.0771	8.274
N0PK	4	2013	110.98	109.937	279.33	293.234	9.8779	8.0227
N0PK	1	2014	95.0114	107.788	315.152	319.996	8.1264	7.402
N0PK	2	2014	104.327	107.79	261.486	269.215	9.0935	8.122
N0PK	3	2014	93.9764	91.411	286.794	334.56	8.0777	8.06
N0PK	4	2014	93.6885	122.348	271.324	265.293	8.6182	8.0415
N0PK	1	2015	110.001	99.3496	272.016	281.683	8.7576	8.7279
N0PK	2	2015	100.453	129.98	240.367	207.362	9.6505	10.2363
N0PK	3	2015	88.3755	91.7576	270.618	269.4	8.9104	8.3993
N0PK	4	2015	97.1606	119.932	264.326	258.024	9.1132	9.1315
N0PK	1	2017	96.493	87.1492	291.762	310.192	8.9224	8.264
N0PK	2	2017	95.1394	112.398	272.878	256.314	9.1157	9.2158
N0PK	3	2017	89.969	107.574	276.939	243.446	8.4452	8.982
N0PK	4	2017	101.954	109.782	271.844	289.193	8.8189	9.0994
N60	1	2010	109.383	114.617	276.413	208.451	9.1363	10.5007
N60	2	2010	96.3274	110.674	261.49	223.906	9.4834	9.9621
N60	3	2010	91.708	117.152	256.204	251.663	9.4489	9.2992
N60	4	2010	98.5093	117.141	281.768	225.808	9.0793	9.8833
N60	1	2011	100.558	123.499	275.139	300.24	9.1991	8.9113
N60	2	2011	95.4841	118.81	243.361	278.94	9.8825	8.9994
N60	3	2011	98.804	107.731	249.714	293.832	9.6425	8.5308
N60	4	2011	89.9362	146.781	259.93	273.094	9.3371	9.0971
N60	1	2012	125.615	108.236	290.275	281.22	9.0523	9.4101
N60	2	2012	113.026	97.448	278.902	296.005	8.7411	9.0905
N60	3	2012	94.6016	98.8573	279.733	295.817	9.0704	8.8724
N60	4	2012	111.099	114.464	302.313	278.832	8.9421	9.6428
N60	1	2013	134.249	176.367	302.672	253.489	9.29	8.3176
N60	2	2013	173.18	169.288	301.089	247.942	9.7593	8.73
N60	3	2013	140.015	136.112	298.627	245.691	9.6537	9.6241
N60	4	2013	112.043	117.824	309.125	298.246	9.6341	8.5282
N60	1	2014	124.612	126.611	313.754	294.207	8.1542	7.7111
N60	2	2014	120.86	135.55	290.52	273.363	8.6501	7.9347
N60	3	2014	113.133	146.105	290.882	265.192	8.7464	8.5933
N60	4	2014	123.969	119.64	278.433	283.39	9.1049	8.1154
N60	1	2015	120.142	120.838	285.298	294.862	8.7592	8.1154
N60	2	2015	114.646	115.738	248.812	254.853	9.0375	8.8934
N60	3	2015	129.686	125.857	265.636	266.484	9.3935	9.0673
N60	4	2015	108.116	133.319	271.261	257.786	8.4614	9.3544
N60	1	2017	104.462	106.505	308.766	309.099	8.8467	8.2843
N60	2	2017	116.89	117.677	270.825	246.989	9.0605	8.1168
N60	3	2017	116.731	106.054	271.472	270.459	9.0828	8.6843
N60	4	2017	130.154	130.508	286.131	253.147	8.765	9.2626
N60PK	1	2010	102.514	119.273	295.128	217.089	8.8279	10.1503
N60PK	2	2010	98.7192	128.232	261.377	248.896	9.0923	9.7384
N60PK	3	2010	97.1992	105.762	292.427	238.507	8.716	9.7471
N60PK	4	2010	104.775	117.874	280.546	244.792	9.0621	10.1845
N60PK	1	2011	100.966	115.73	281.708	291.697	9.0089	8.714
N60PK	2	2011	86.3086	118.062	263.169	279.726	9.2504	8.7501
N60PK	3	2011	92.4405	119.289	244.671	277.073	9.6628	9.0226
N60PK	4	2011	96.4957	132.631	242.627	295.941	9.8024	8.9824
N60PK	1	2012	109.867	100.673	300.373	286.431	8.7075	9.2157
N60PK	2	2012	130.885	96.3687	293.326	299.312	8.6353	9.0292
N60PK	3	2012	116.318	124.626	290.068	274.369	8.7874	9.6661
N60PK	4	2012	94.9756	119.157	342.061	274.052	7.9558	9.2917
N60PK	1	2013	173.636	170.912	286.882	266.452	8.8721	7.9851
N60PK	2	2013	146.752	123.83	293.717	278.02	9.177	8.6306
N60PK	3	2013	153.573	134.695	279.811	281.211	9.6758	8.6872
N60PK	4	2013	144.22	113.112	314.189	298.562	9.4402	8.251
N60PK	1	2014	153.018	140.525	299.203	287.869	8.6352	7.596
N60PK	2	2014	134.191	160.549	294.739	258.075	8.588	8.0138
N60PK	3	2014	103.312	146.111	298.688	303.304	8.0694	7.7692
N60PK	4	2014	113.396	119.097	305.57	295.483	8.1746	7.7979
N60PK	1	2015	123.326	82.21	283.608	274.306	8.9768	8.0972
N60PK	2	2015	106.278	119.553	272.466	240.583	8.2921	9.3958
N60PK	3	2015	118.484	126.716	259.917	258.606	9.1128	9.2448
N60PK	4	2015	106.756	131.689	266.891	257.839	7.7756	8.7929
N60PK	1	2017	98.7996	101.944	309.736	318.238	8.4941	7.8722
N60PK	2	2017	100.395	96.7877	298.483	288.694	8.5321	8.3863
N60PK	3	2017	94.224	110.728	306.15	269.239	8.4848	8.7879
N60PK	4	2017	109.728	108.741	304.19	294.074	8.1415	8.5373
N120PK	1	2010	103.541	121.501	285.803	246.774	8.9468	9.5905
N120PK	2	2010	116.826		302.999		8.7128
N120PK	3	2010	106.87	114.366	288.089	271.009	9.0468	8.9604
N120PK	4	2010	105.181	122.981	280.171	244.571	9.0417	9.6564
N120PK	1	2011	108.757	111.404	258.959	292.264	9.4123	8.5388
N120PK	2	2011	114.327	112.683	281.565	283.124	9.0794	8.8467
N120PK	3	2011	98.0901	110.888	267.075	282.087	9.3489	8.4253
N120PK	4	2011	95.3467	130.79	265.002	278.453	9.4099	9.0391
N120PK	1	2012	108.125	131.624	290.388	274.405	9.0733	9.3542
N120PK	2	2012	106.974	100.884	299.99	293.49	8.6688	9.075
N120PK	3	2012	112.576	115.936	302.49	297.166	8.9711	8.6773
N120PK	4	2012	87.1444	117.465	294.731	279.34	8.8585	9.2392
N120PK	1	2013	112.363	181.298	285.08	268.983	9.4333	9.1585
N120PK	2	2013	141.369	181.648	298.201	244.239	9.0818	8.7874
N120PK	3	2013	122.4	168.537	286.287	238.051	9.2204	8.9629
N120PK	4	2013	124.134	198.501	311.647	241.387	7.8819	9.502
N120PK	1	2014	141.01	161.998	275.191	295.882	8.7397	7.4535
N120PK	2	2014	132.387	148.548	292.038	285.258	8.5641	7.5531
N120PK	3	2014	123.207	130.821	305.261	287.116	8.5068	7.3364
N120PK	4	2014	121.959	156.75	298.423	268.158	8.5153	8.0161
N120PK	1	2015	137.099	164.595	272.528	228.031	9.2073	9.817
N120PK	2	2015	143.875	135.152	252.427	261.104	9.4176	9.3103
N120PK	3	2015	118.356	124.843	288.414	266.8	8.9121	8.9543
N120PK	4	2015	124.131	121.607	260.327	243.951	8.5876	9.451
N120PK	1	2017	110.249	96.9665	334.942	326.569	8.0128	7.6709
N120PK	2	2017	126.865	106.061	286.758	312.474	8.8116	7.7511
N120PK	3	2017	123.016	83.0494	306.495	349.233	8.3091	7.083
N120PK	4	2017	111.41	106.193	305.317	293.134	8.3614	8.4299
